# Supplementary material
Source: PubMed Central journal article supplement (PMC4512845)

**Figure S1. *Otx1* expression in *Otx2 RxCre* cKOs (Refers to Figure 1).** ISH showing *Otx1* expression in rostral-caudal series of sections from (A-C) *Otx2f/+* and (D-F) *Otx2f/-; RxCre* forebrains at E11.5. Note that the expression of *Otx1* complements that of *Otx2* in the early telencephalon (see Figure 1), and that *Otx1* is not markedly changed in cKOs. *Scale bars: 0.5mm.*

**Figure S2. *Otx2* and cortical patterning (Refers to Figure 3).** (A-B) *Otx2* expression is positively regulated by *Fgf8* from the RPC, as demonstrated by diminished expression in *Fgf8<sup>CreER/neo</sup>* (effectively *Fgf8<sup>null/neo</sup>*) embryos at E10.5. (C-F) E13.5 ISH showing effects of *Otx2* loss of function on cortical patterning. (C-D) *COUP-TF1* expression is reduced and (E-F) *SP8* is upregulated in the dorsal cortex of *RxCre* cKOs. Abbreviations: Di, diencephalon, rTel, rostral telencephalon, RPC, rostral patterning center. *Scale bars: 0.4mm.*

**Figure S3 (Refers to Figure 7). Abnormal MGE and POA development in *Nkx2.1Cre* cKOs at E13.5 and P15 (Refers to Figure 7).** ISH show expression of (A-C') *Nkx5.1*, (D-F') *COUP-TF1*, and (G-I') *Nkx2.1* in (A-I) *Otx2f/+* and (A'-I') *Otx2f/-; Nkx2.1Cre* forebrains. (J-L') Anti-ChAT IHC on P15 coronal sections from (J-L) *Otx2f/+* and (J'-L') *Otx2f/-; Nkx2.1Cre* brains. Abbreviations as in Figure 8. *Scale bars: 0.5mm.*

**Figure S4. Postnatal deficits in MGE derivatives in *Otx2* cKOs (Refers to Figure 7).** (A-L') P0 ISHs on (A-L) *Otx2f/+* and (A'-L') *Otx2f/-; RxCre* brains with probes to (A-C') *Lhx6*; (D-F') *Lhx8*; (G-H') *TrkA*, (I-I') *Gbx1*. (J-L') Anti-ChAT IHC on (J-L) *Otx2f/+* and (J'-L') *Otx2f/-; RxCre* brain sections from two week old mice. Abbreviations: VP, ventral pallidum; AcS, shell of accumbens; DBB, diagonal band of Broca; NB, nucleus basalis; MS, medial septum. *Scale bars: A-I' = 0.25mm, J-L' = 0.5mm.*

**Figure S5 (Refers to Figure 2). Anti-OTX2 ChIP-seq peaks occupy basal ganglia enhancers.** Coronal sections of E11.5 embryos showing expression of telencephalic enhancers driving  $\beta$ -galactosidase expression, visualized with X-Gal staining, from transient transgenic mice (A, C, E, G, I K). The genomic location of each enhancer (green rectangle) is shown along with the called peaks from 3 separate Anti-OTX2 ChIP-seq experiments (B, D, F, H, J, I; *Otx2* R1-3 respectively, red-yellow bars). (M) Venn diagram showing overlap of called peaks between each of the OTX2 ChIP replicates R1-

R3. The intersection of all three replicates (590 peaks, white) was used for motif and GO analysis in Figure S6. (N) Graph showing the distribution of the distances from each of the OTX2 ChIP peaks to the TSS of its associated gene. Abbreviations: cortex: Cx, lateral ganglionic eminence: LGE, medial ganglionic eminence: MGE.

**Figure S6 (Refers to Figure 2). Genomic sequence motifs and gene ontology derived from anti-OTX2 ChIP-seq.** Top ten sequence motifs derived from the intersection of all three Anti-OTX2 ChIP-seq replicates by RSAT(A), displaying the associated transcription factor, number and percentage of 590 total peaks, and the average number of motifs per peak. Top results from gene ontology analysis of peaks using the GREAT annotation tool for molecular function (B) and biological process (C) for terms with a FDR Q-Val < 1E-3.

**Figure S7 (Refers to Figures 4, 5 and 6). Diagram summarizing Otx2 effects on POA and MGE patterning.** At E11.5, *Otx2* cKOs lack expression of vMGE VZ markers (*Tal2*, *Tll2*) as well as vMGE expression of *Olig1* and *Zic1*. POA genes expressed in the VZ (*COUP-TF1*, *Dbx1*) and MZ (*Nkx5.1*, *Nkx5.2*, *Sox14*) expand dorsally and rostrally into the MGE. In addition, some vLGE genes (*COUP-TF1*, *Sizn1*) expand or shift ventrally into the dorsal MGE. Together, these changes result in mis-specification of the vMGE toward a POA-like fate. At later stages, this results in agenesis or altered molecular properties of the globus pallidus and a severe reduction in cholinergic neurons. In addition to these changes in regional MGE patterning, *Otx2* cKOs have reduced neurogenesis and reduced numbers of oligodendrocyte progenitors in the MGE at this stage, which are not shown in the diagram.

**Table S1 (Refers to Figures 1-7). Genes discussed in text that were identified in microarray as significantly de-regulated in Otx2; RxCre cKOs.** ChIP-seq data designations (see also Figure 2): '+' reproducible peaks in or near locus; '(+)' peaks not reproducible, of low amplitude, >1 MB from locus, or in gene-dense region near locus; '-' no peaks in or near locus. Genes having two numbers assigned were deregulated on two independent microarray spots. Some B<0 genes were investigated because of biological relevance, existence of outliers in sample group, or absolute intensity values

close to detection threshold. See Supplementary Table 1 for the complete microarray (B>0) dataset.

| GROUP                   | GENE                   | FOLD CHANGE | B VALUE       | ChIP-Seq peaks? |
|-------------------------|------------------------|-------------|---------------|-----------------|
| Otx family              | <i>Otx2</i>            | 2.756       | 3.45          | +               |
|                         | <i>Otx1</i>            | 1.318       | 0.21          | +               |
| Midbrain/hindbrain      | <i>En2</i>             | 4.776       | -2.66         | -               |
|                         | <i>Pax3</i>            | 1.784       | -2.42         | +               |
| Oligodendrogenesis      | <i>Olig1</i>           | 0.369       | 4.782         | +               |
|                         | <i>Olig2</i>           | 0.593       | 1.412         | +               |
| MGE neurogenesis        | <i>Gbx2</i>            | 0.289       | 2.97          | +               |
|                         | <i>Arx</i>             | 0.597       | 0.42          | +               |
|                         | <i>Robo2</i>           | 0.659       | -2.56         | +               |
|                         | <i>Plxna4</i>          | 0.483       | 0.11          | (+)             |
|                         | <i>NeuroD6</i>         | 0.600       | -1.845        | (+)             |
|                         | <i>NeuroD2</i>         | 0.58/0.586  | -1.112/-3.235 | -               |
|                         | <i>Hes1</i>            | 1.413       | -1.975        | +               |
|                         | <i>Id4</i>             | 1.331       | -2.303        | (+)             |
| POA patterning          | <i>Nkx5.1 (Hmx3)</i>   | 4.062       | 2.829         | +               |
|                         | <i>Nkx5.2 (Hmx2)</i>   | 2.993       | 3.539         | +               |
|                         | <i>Sox14</i>           | 2.021       | 3.715         | +               |
|                         | <i>Dbx1</i>            | 2.172       | -1.743        | +               |
|                         | <i>Arhgap22</i>        | 3.214       | 2.79          | -               |
|                         | <i>Slit2</i>           | 1.897       | 0.146         | -               |
|                         | <i>Sox3</i>            | 1.603       | -0.474        | -               |
|                         | <i>mShisa (Shisa2)</i> | 1.404       | 0.305         | (+)             |
|                         | <i>Spry1</i>           | 0.734       | -5.579        | (+)             |
| MGE patterning          | <i>Tal2</i>            | 0.271       | 1.83          | +               |
|                         | <i>Tll2</i>            | 0.584       | 0.818         | +               |
|                         | <i>Tgfb3</i>           | 0.605       | -0.19         | (+)             |
|                         | <i>brevican</i>        | 0.137       | 2.182         | -               |
|                         | <i>Sall3</i>           | 1.424       | 0.432         | +               |
|                         | <i>Spry2</i>           | 1.378       | -4.057        | (+)             |
| Septum                  | <i>Msx3</i>            | 2.12        | 2.233         | -               |
| Interneuron genes       | <i>Lhx6</i>            | 0.597/0.453 | 0.623/1.79    | (+)             |
|                         | <i>Lhx8</i>            | 0.247/0.222 | 3.888/4.325   | +               |
|                         | <i>maf-a</i>           | 0.598       | 2.043         | (+)             |
|                         | <i>maf-b</i>           | 0.686       | 0.319         | +               |
|                         | <i>c-maf (Maf)</i>     | 0.566       | -4.143        | -               |
|                         | <i>Somatostatin</i>    | 0.090       | 1.137         | (+)             |
|                         | <i>Neuropeptide Y</i>  | 0.366       | 1.776         | (+)             |
|                         | <i>Gad1</i>            | 0.651       | 0.558         | +               |
| Other genes of interest | <i>Gbx1</i>            | 0.429       | 2.023         | (+)             |
|                         | <i>Nkx2.9</i>          | 0.509       | 0.692         | +               |
|                         | <i>Sox10</i>           | 0.486       | 1.82          | (+)             |



*Otx1* SISH

*Otx2*<sup>f/f</sup>

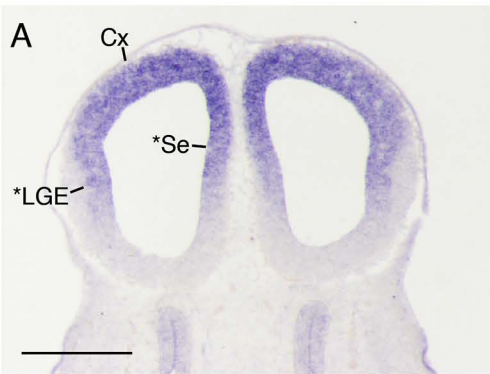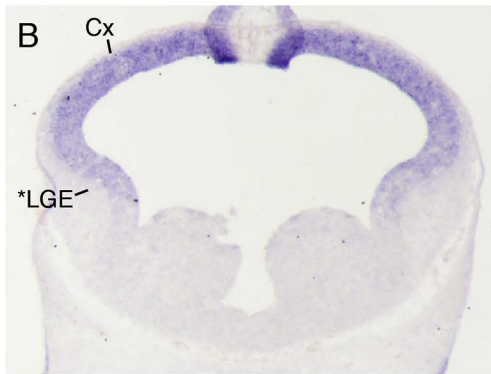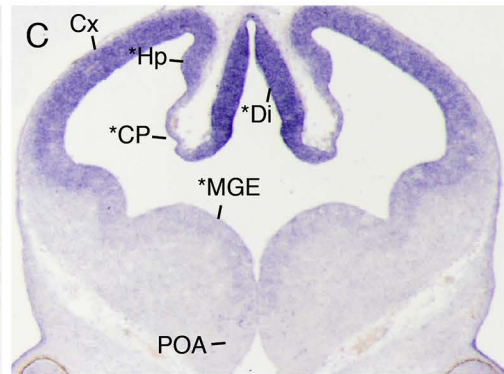

*Otx2*<sup>f/-</sup>; *RxCre*

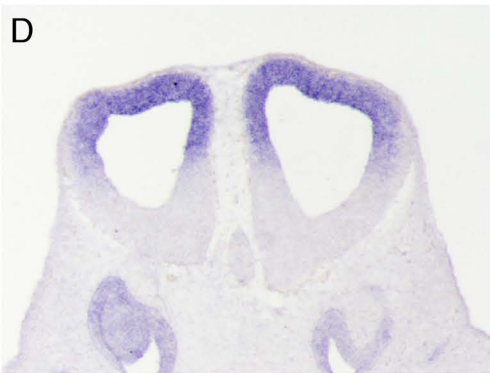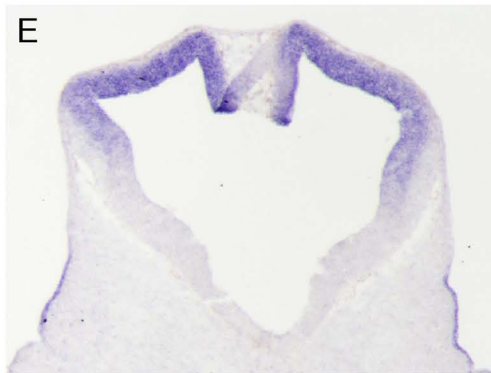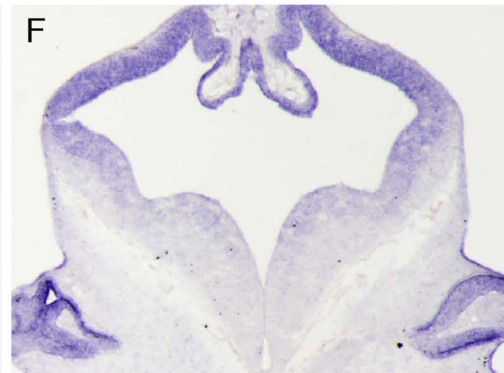

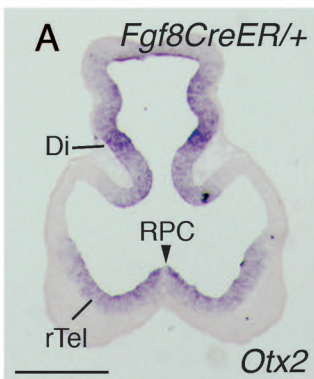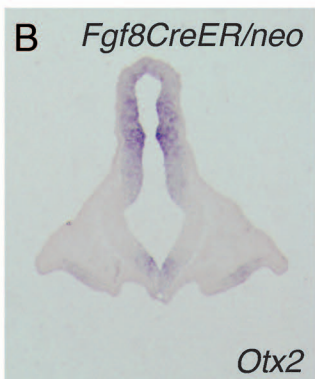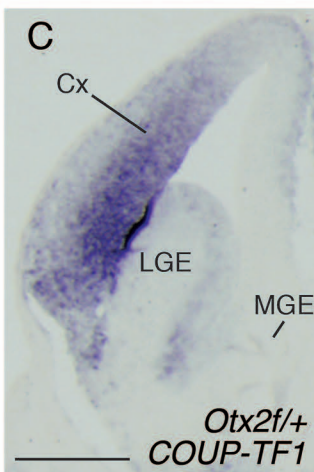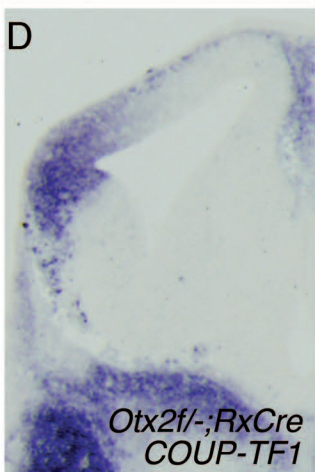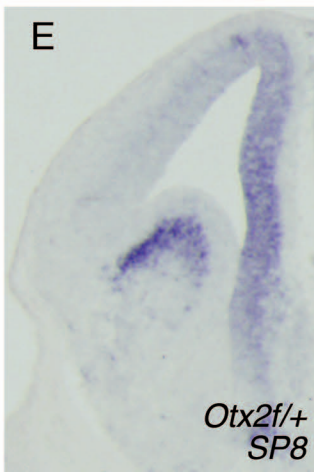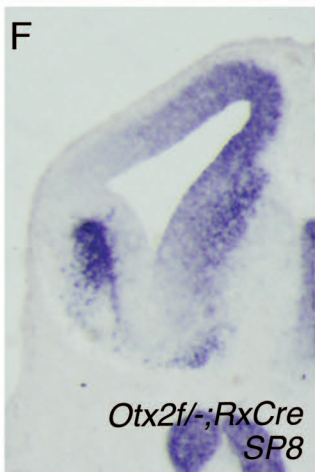



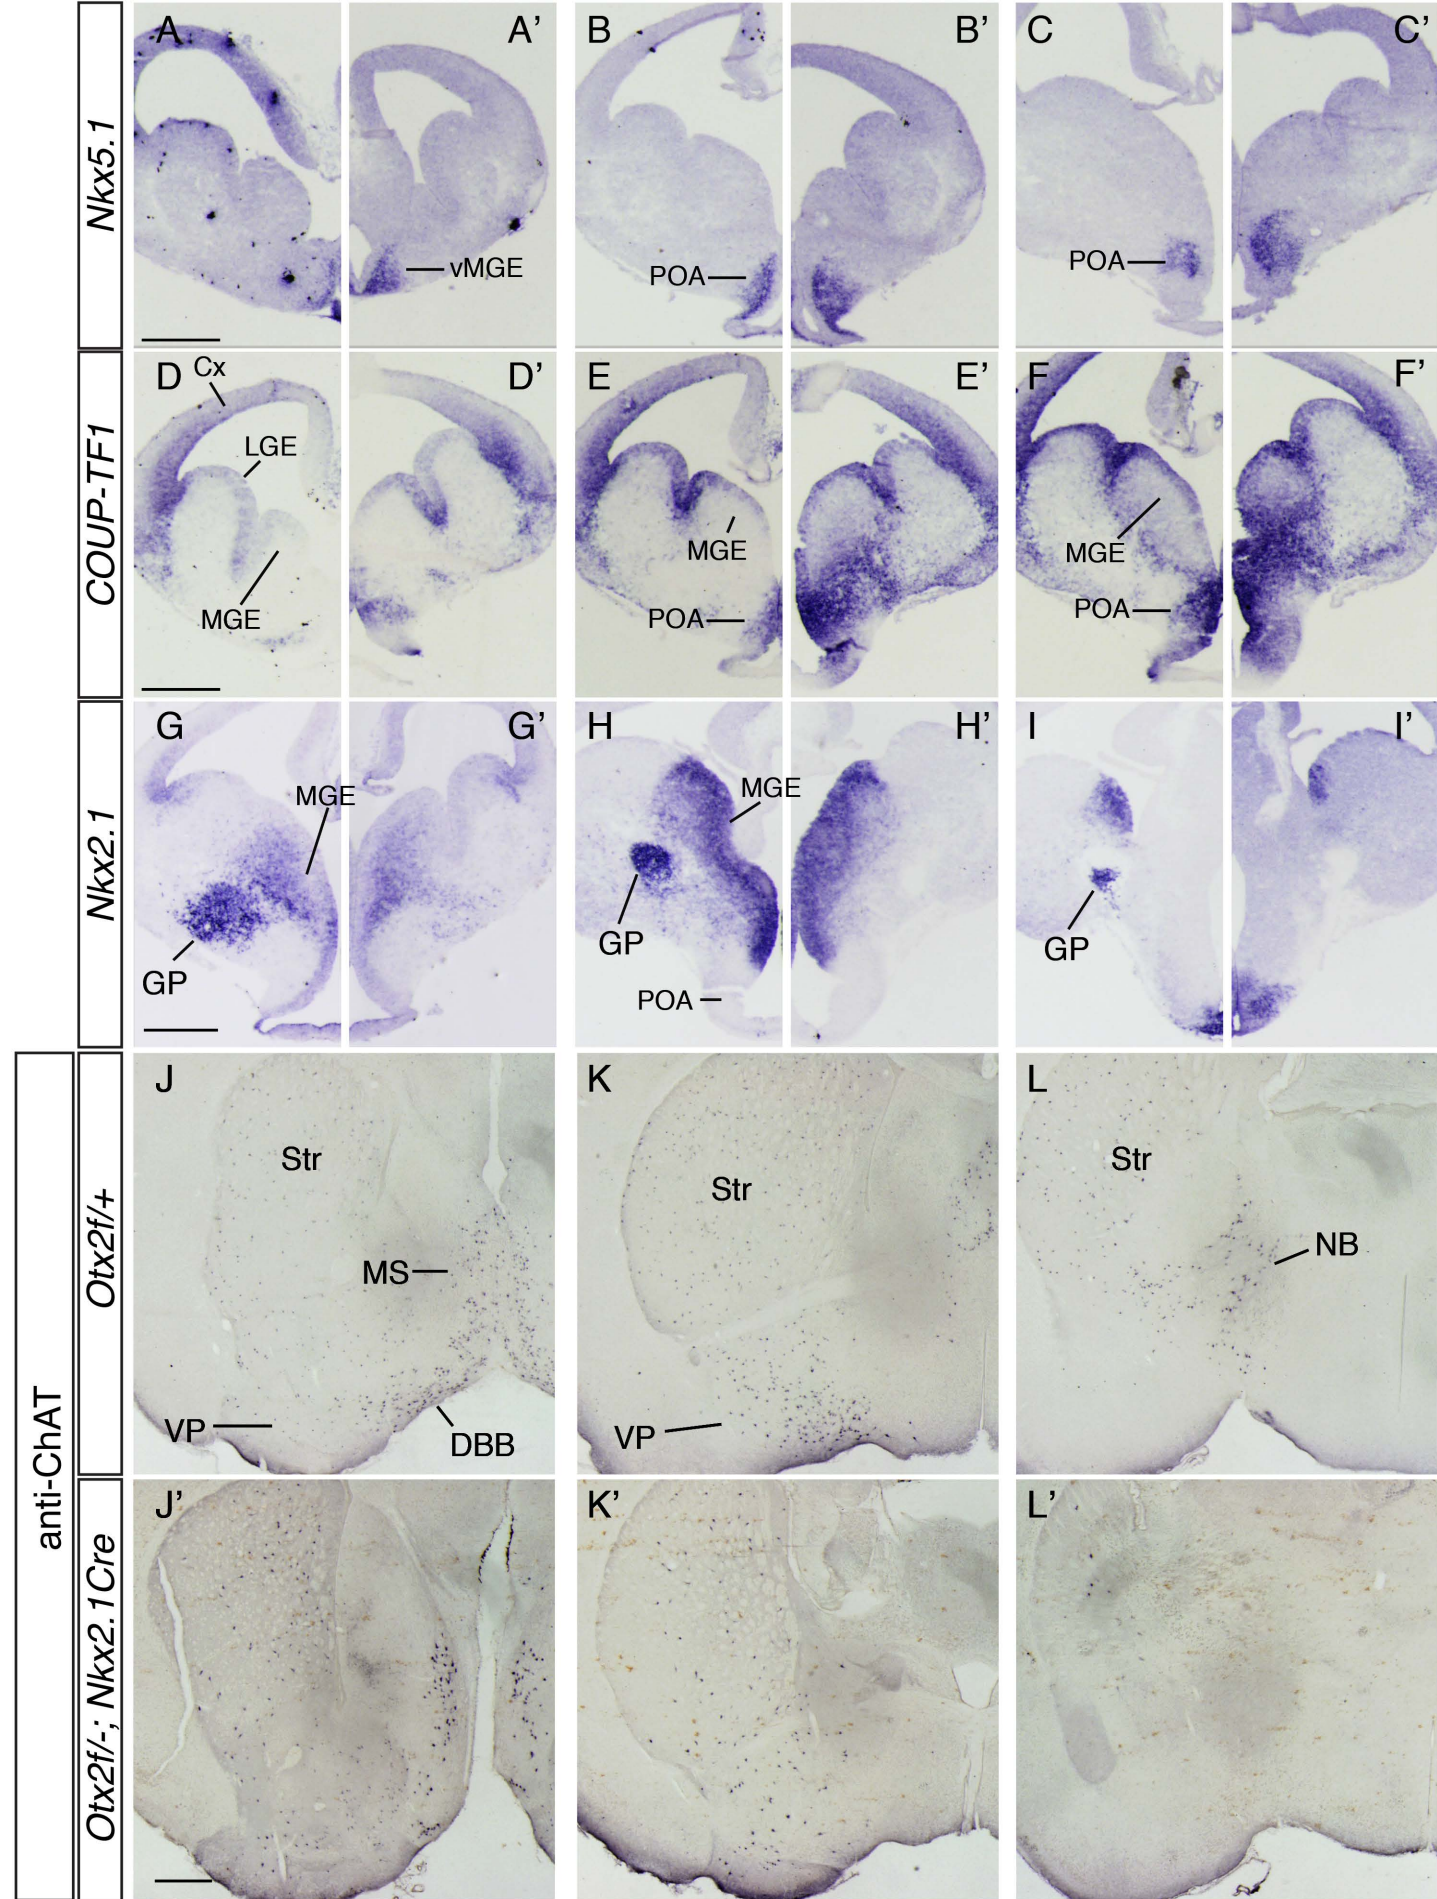



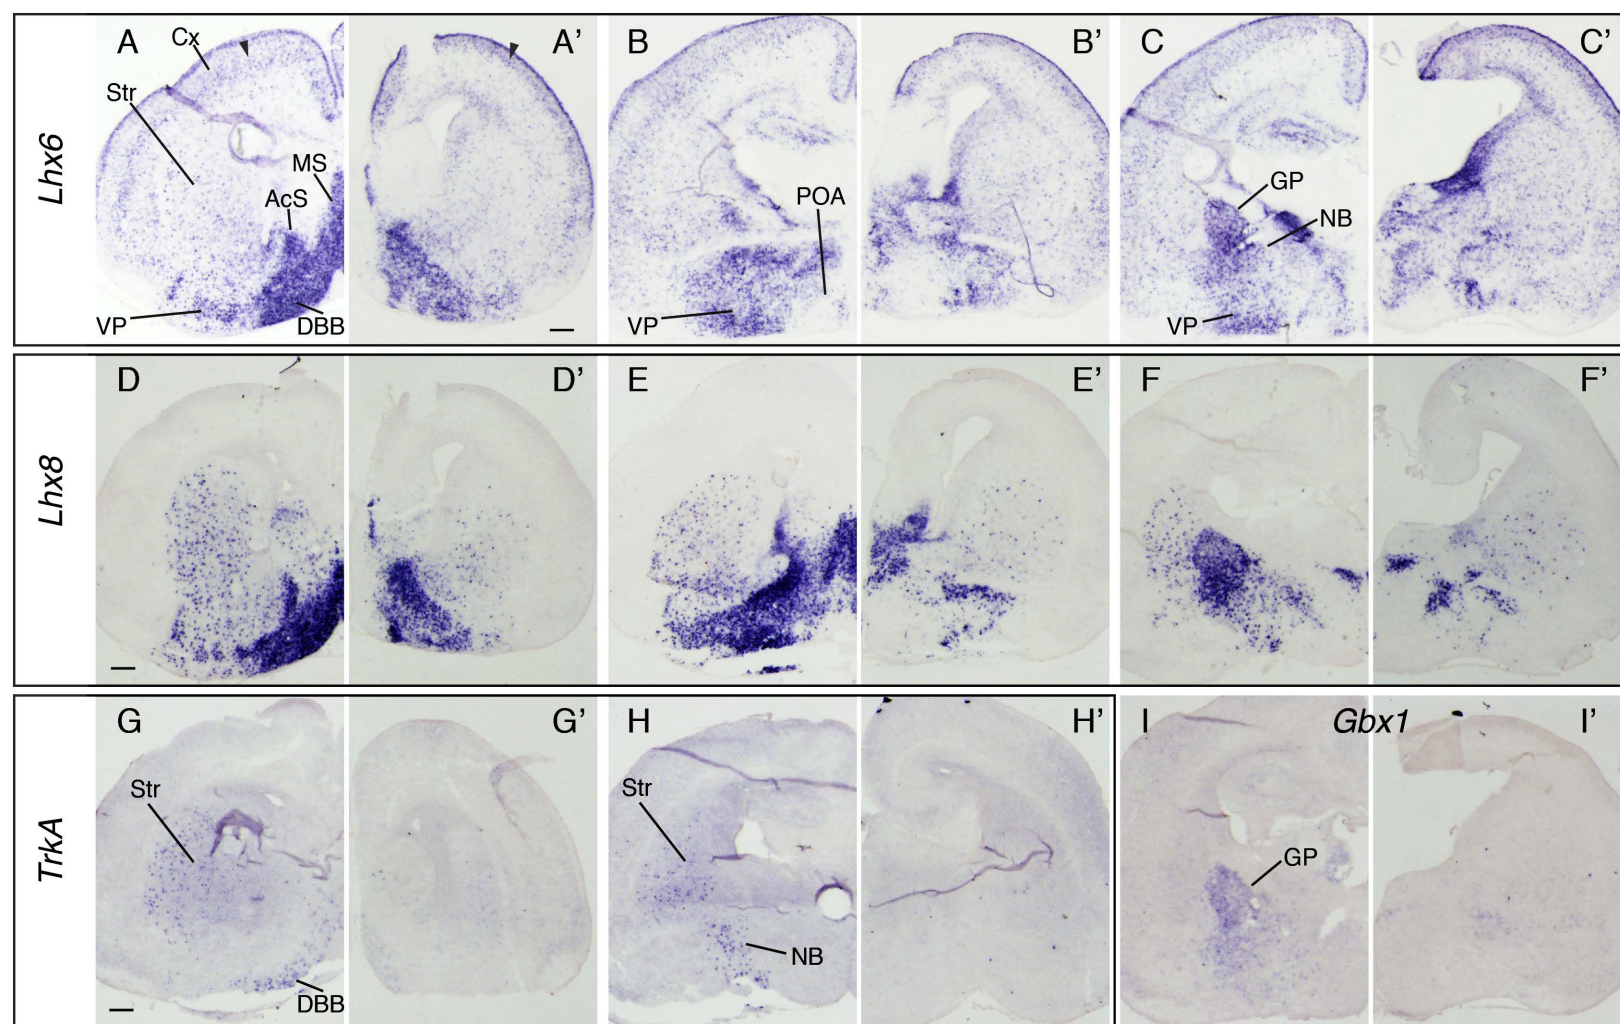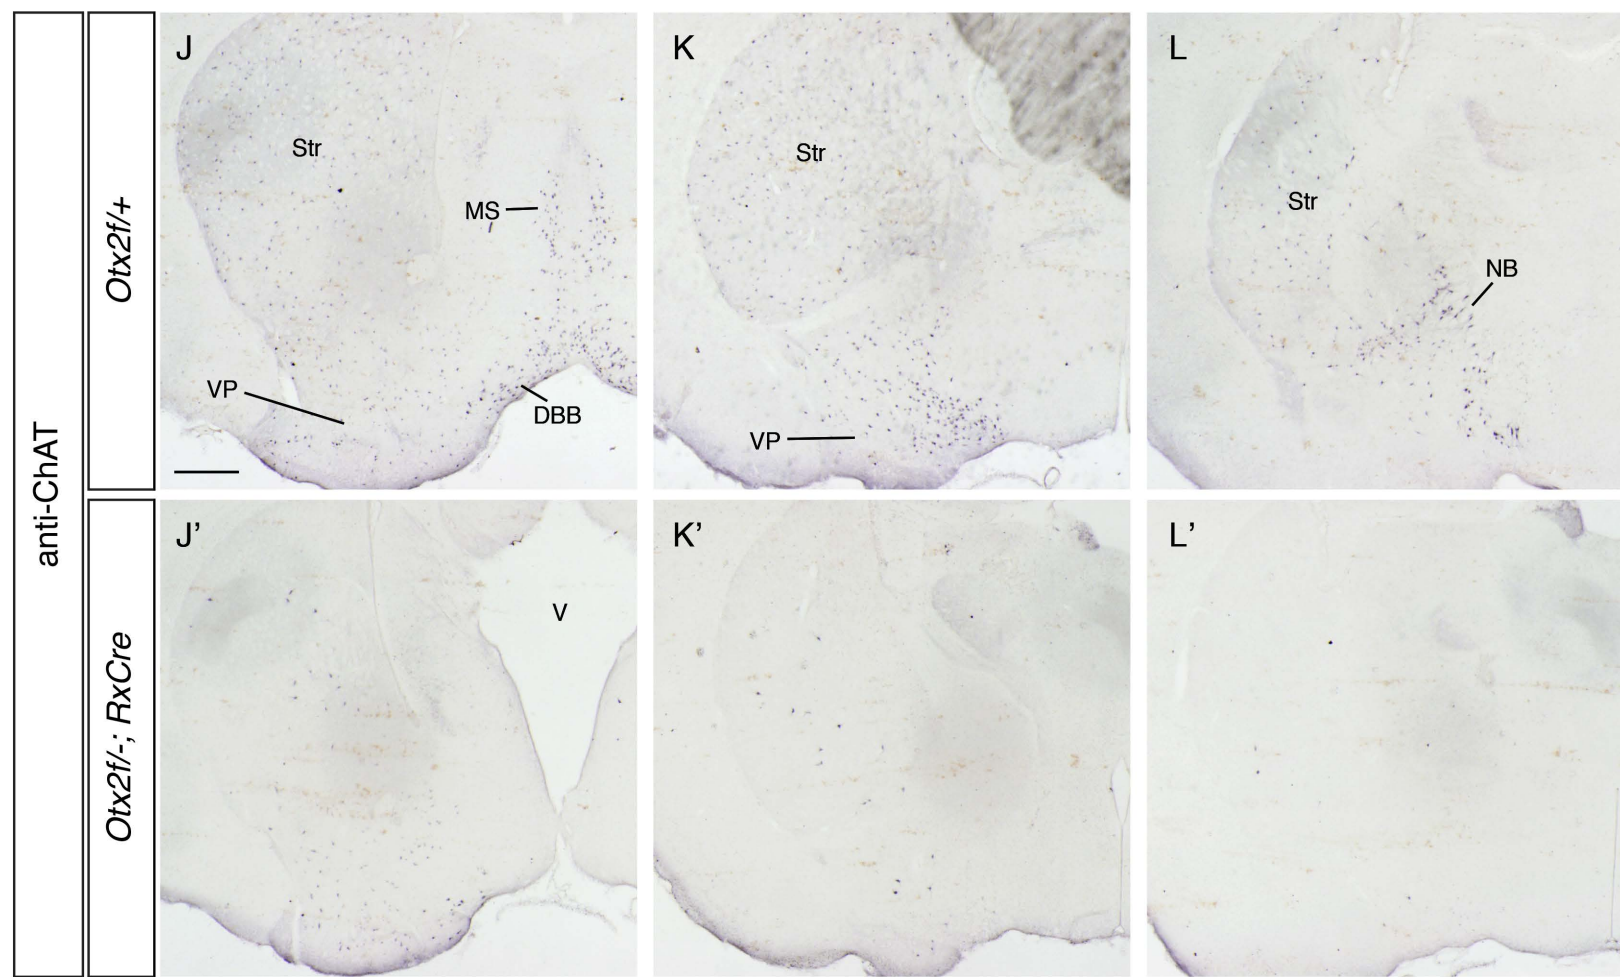



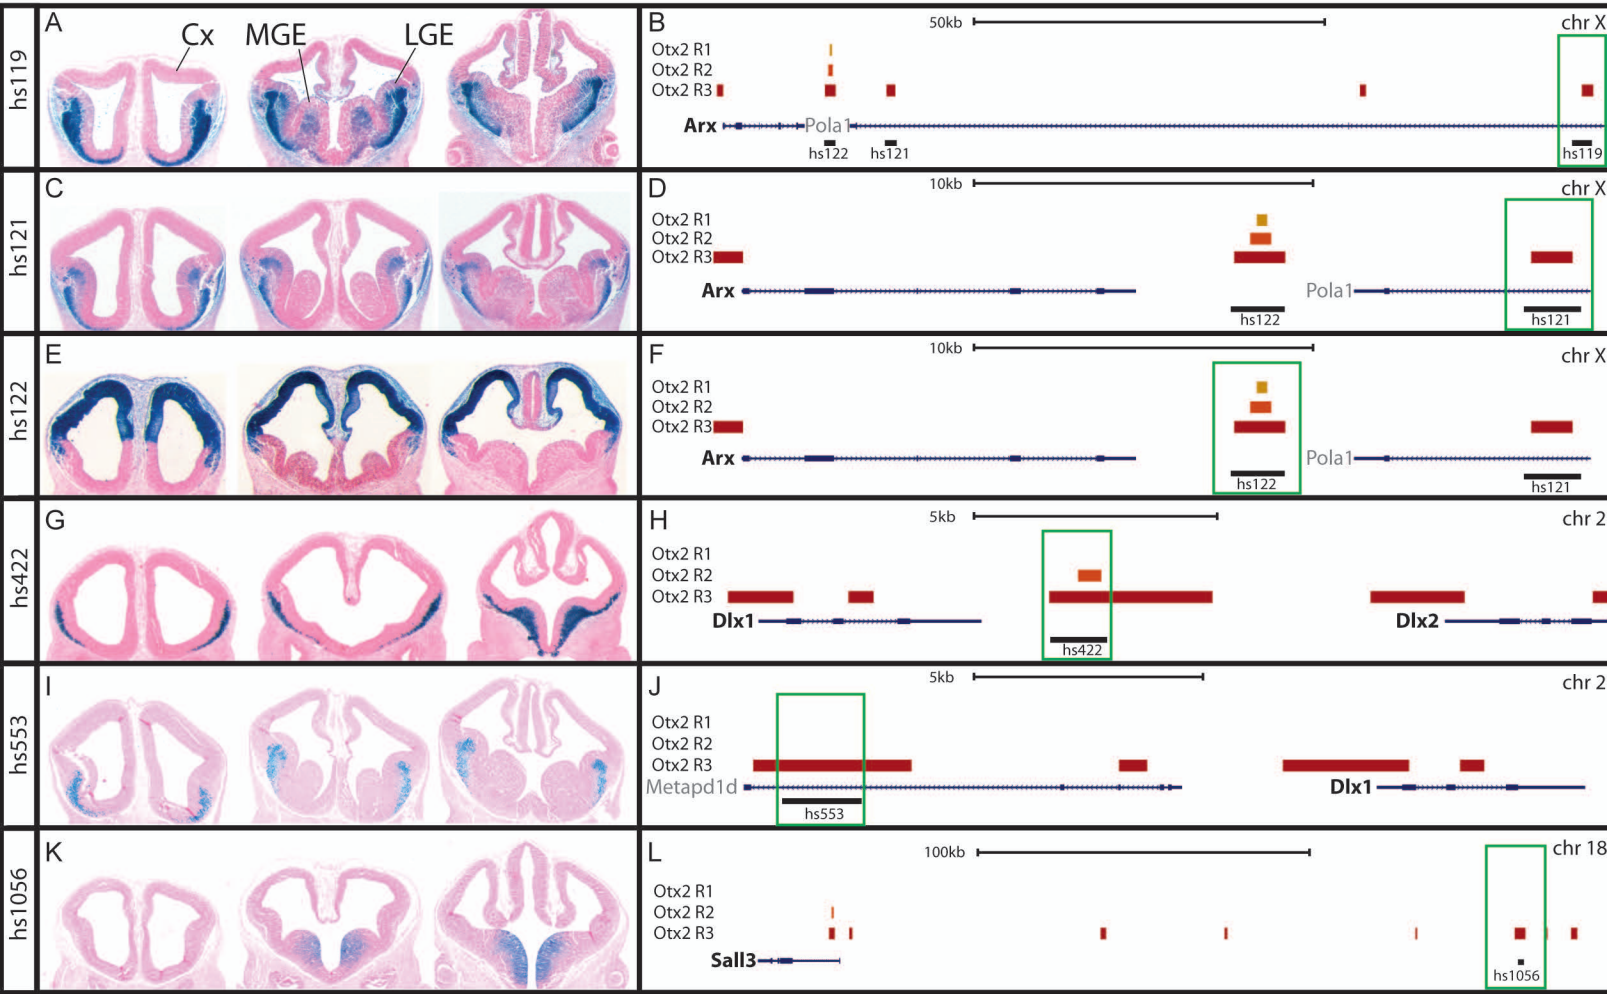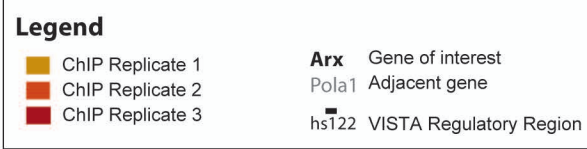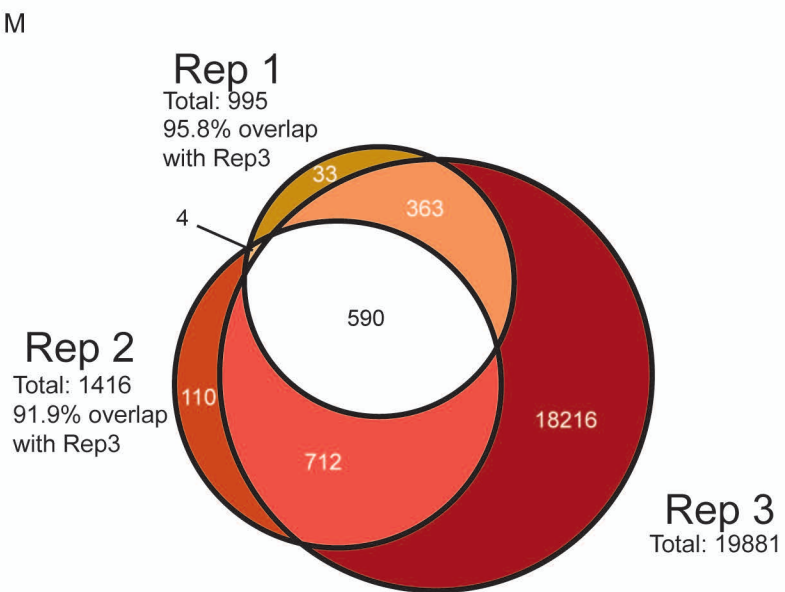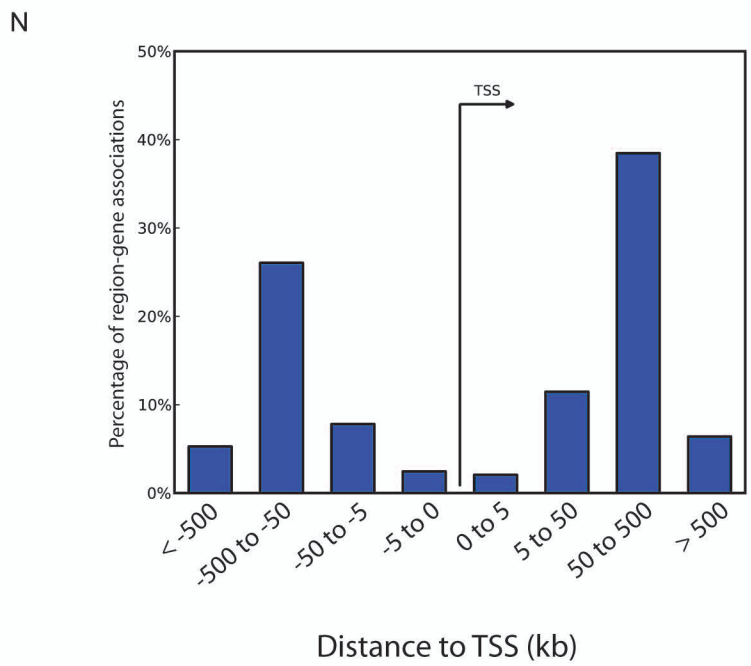

A

| Name  | # of peaks with motif | % of peaks with motif | Ave. # motifs per peak |                                                                                   |
|-------|-----------------------|-----------------------|------------------------|-----------------------------------------------------------------------------------|
| Otx2  | 236                   | 40.00%                | 1.10                   |   |
| Otx2  | 172                   | 29.15%                | 1.09                   |  |
| Otx2  | 156                   | 26.44%                | 1.05                   |  |
| Otx2  | 129                   | 21.86%                | 1.05                   |  |
| Nobox | 74                    | 12.54%                | 1.19                   |  |

| Name           | # of peaks with motif | % of peaks with motif | Ave. # motifs per peak |                                                                                     |
|----------------|-----------------------|-----------------------|------------------------|-------------------------------------------------------------------------------------|
| Sox2           | 71                    | 12.03%                | 1.11                   |   |
| Sox2           | 121                   | 20.56%                | 1.15                   |  |
| HoxA5/<br>Pdx1 | 134                   | 22.71%                | 1.20                   |  |
| HoxA5/<br>Pdx1 | 88                    | 14.92%                | 1.08                   |  |
| Unknown        | 89                    | 15.08%                | 1.17                   |  |

B

## GO Molecular Function

| Term Name                                                              | Rank | Raw P-Val | FDR Q-Val | Fold Enrichment | Region Hits | Region Set Coverage |
|------------------------------------------------------------------------|------|-----------|-----------|-----------------|-------------|---------------------|
| sequence-specific DNA binding                                          | 1    | 6.58E-12  | 2.14E-08  | 2.1863          | 86          | 18.18%              |
| transcription regulatory region DNA binding                            | 8    | 1.48E-07  | 6.02E-05  | 2.4164          | 43          | 9.09%               |
| regulatory region DNA binding                                          | 9    | 2.20E-07  | 7.95E-05  | 2.3809          | 43          | 9.09%               |
| transcription regulatory region sequence-specific DNA binding          | 12   | 8.78E-07  | 2.38E-04  | 3.3187          | 23          | 4.86%               |
| chromatin binding                                                      | 14   | 9.23E-06  | 2.15E-03  | 2.3286          | 33          | 6.98%               |
| RNA polymerase II regulatory region sequence-specific DNA binding      | 16   | 1.44E-05  | 2.92E-03  | 4.0547          | 14          | 2.96%               |
| RNA polymerase II regulatory region DNA binding                        | 17   | 1.69E-05  | 3.24E-03  | 3.9942          | 14          | 2.96%               |
| Wnt-protein binding                                                    | 18   | 1.77E-05  | 3.19E-03  | 6.3177          | 9           | 1.90%               |
| sequence-specific DNA binding RNA Pol II transcription factor activity | 19   | 2.57E-05  | 4.40E-03  | 2.5578          | 25          | 5.29%               |
| core promoter proximal region sequence-specific DNA binding            | 21   | 1.44E-04  | 2.23E-02  | 4.7881          | 9           | 1.90%               |
| core promoter proximal region DNA binding                              | 24   | 2.15E-04  | 2.91E-02  | 4.5342          | 9           | 1.90%               |
| axon guidance receptor activity                                        | 25   | 2.48E-04  | 3.23E-02  | 5.8158          | 7           | 1.48%               |
| basal RNA polymerase II transcription machinery binding                | 30   | 3.46E-04  | 3.75E-02  | 8.5478          | 5           | 1.06%               |
| ephrin receptor activity                                               | 31   | 3.66E-04  | 3.84E-02  | 4.2105          | 9           | 1.90%               |
| transmembrane receptor protein kinase activity                         | 34   | 5.26E-04  | 5.03E-02  | 2.5423          | 17          | 3.59%               |

C

## GO Biological Process

| Term Name                                                               | Rank | Raw P-Val  | FDR Q-Val  | Fold Enrichment | Region Hits | Region Set Coverage |
|-------------------------------------------------------------------------|------|------------|------------|-----------------|-------------|---------------------|
| central nervous system development                                      | 1    | 5.9129E-19 | 5.0751E-15 | 2.455           | 111         | 23.47%              |
| regulation of transcription from RNA polymerase II promoter             | 2    | 2.6546E-18 | 1.1392E-14 | 2.2624          | 123         | 26.00%              |
| brain development                                                       | 3    | 1.1766E-17 | 3.3663E-14 | 2.613           | 94          | 19.87%              |
| forebrain development                                                   | 8    | 5.6142E-16 | 6.0233E-13 | 3.0487          | 68          | 14.38%              |
| generation of neurons                                                   | 12   | 1.1237E-15 | 8.037E-13  | 2.0985          | 122         | 25.79%              |
| neurogenesis                                                            | 14   | 2.8489E-15 | 1.7466E-12 | 2.0465          | 125         | 26.43%              |
| neuron differentiation                                                  | 15   | 3.2737E-15 | 1.8732E-12 | 2.2889          | 101         | 21.35%              |
| negative regulation of transcription, DNA-dependent                     | 16   | 4.3757E-15 | 2.3473E-12 | 2.3739          | 94          | 19.87%              |
| negative regulation of RNA metabolic process                            | 18   | 7.8523E-15 | 3.7442E-12 | 2.3508          | 94          | 19.87%              |
| negative regulation of gene expression                                  | 19   | 1.9571E-14 | 8.841E-12  | 2.2877          | 96          | 20.30%              |
| negative regulation of nitrogen compound metabolic process              | 20   | 3.2804E-14 | 1.4078E-11 | 2.268           | 96          | 20.30%              |
| negative regulation of transcription from RNA polymerase II promoter    | 21   | 5.1473E-14 | 2.1038E-11 | 2.6695          | 72          | 15.22%              |
| negative regulation of nucleobase-containing compound metabolic process | 23   | 7.8758E-14 | 2.939E-11  | 2.2475          | 95          | 20.08%              |
| negative regulation of cellular macromolecule biosynthetic process      | 24   | 8.5473E-14 | 3.0567E-11 | 2.2574          | 94          | 19.87%              |
| negative regulation of macromolecule biosynthetic process               | 26   | 1.1034E-13 | 3.6425E-11 | 2.2346          | 95          | 20.08%              |

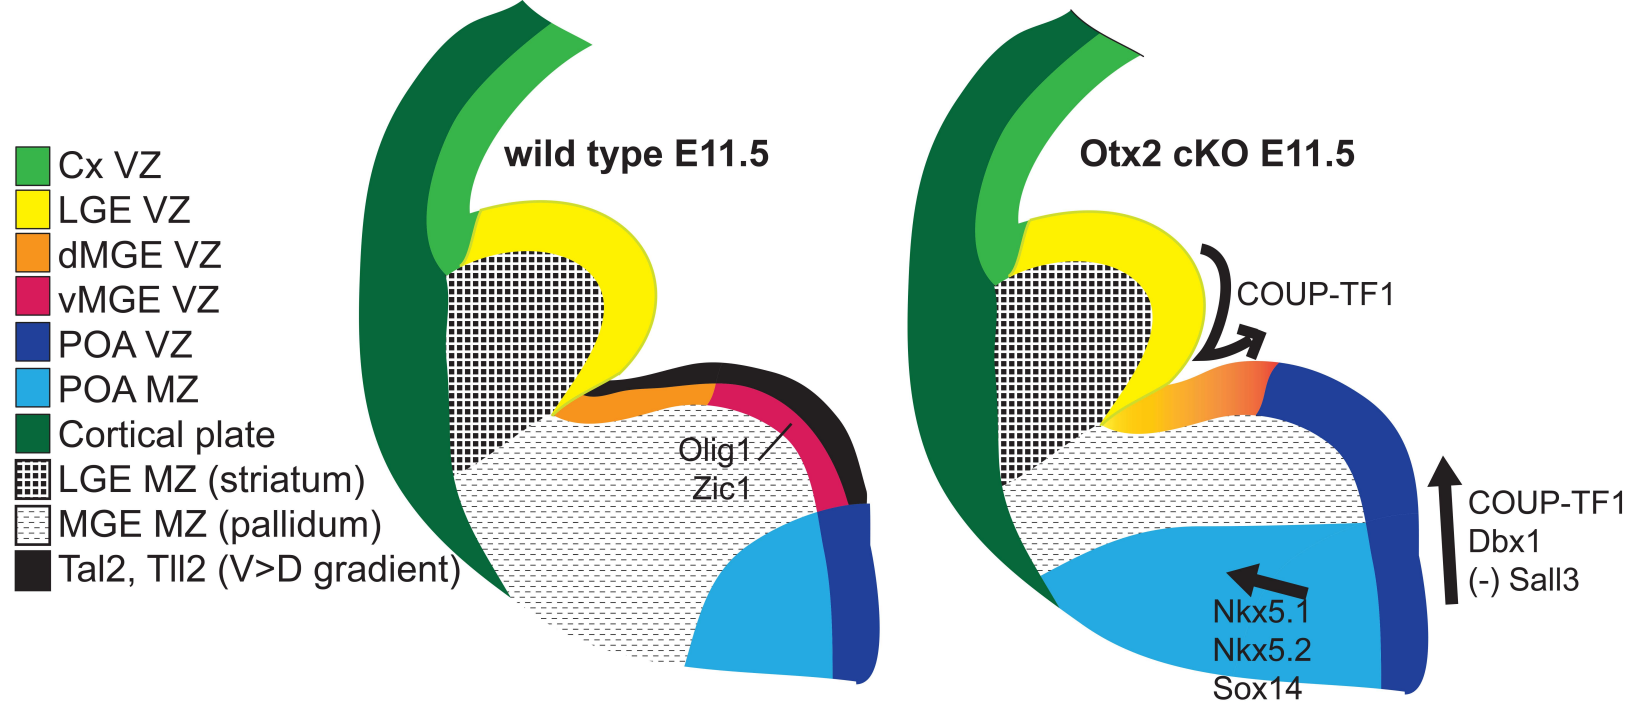

Supplement: NIHMS705061-supplement-1.pdf [file NIHMS705061-supplement-1.pdf]
