# Supplementary material
Source: PubMed Central journal article supplement (PMC4512845)
Supplement: NIHMS705061-supplement-2.pdf [file NIHMS705061-supplement-2.pdf]

## Inventory of Supplementary Information

**7 Supplementary Figures.**

**1 Table.**

**Figure S1. *Otx1* expression in *Otx2 RxCre* cKOs.**

**Figure S2. *Otx2* and cortical patterning. (**

**Figure S3. Abnormal MGE and POA development in *Nkx2.1Cre* cKOs at E13.5 and P15.**

**Figure S4. Postnatal deficits in MGE derivatives in *Otx2* cKOs.**

**Figure S5. Anti-OTX2 ChIP-seq peaks occupy basal ganglia enhancers.**

**Figure S6. Genomic sequence motifs and gene ontology derived from anti-OTX2 ChIP-seq.**

**Figure S7. Diagram summarizing *Otx2* effects on POA and MGE patterning.**

**Table S1: Summary of RNA expression changes comparing WT and RX-Cre *Otx2* CKO E12.5 ganglionic eminences.**
